# Supplementary material for: Performance and Biomechanics in the Flight Period of Ski Jumping: Influence of Ski Attitude
Source: MDPI journal article supplement (doi:10.3390/biology11050671), 2022-04-27
Supplement: s1 [file s1]

## Article

# Performance and Biomechanics in the Flight Period of Ski Jumping: Influence of Ski Attitude

Lin Zhang <sup>1</sup>, Xiong Li <sup>2</sup>, Xin Wang <sup>1,\*</sup>, Long Chen <sup>2</sup>, and Tianyu Zhao <sup>2,\*</sup>

<sup>1</sup> Department of Kinesiology, Shenyang Sport University, Shenyang 110102, China

<sup>2</sup> Department of Mechanics, Northeastern University, Shenyang 110819, China

\* Correspondence: wangxin@syty.edu.cn (X.W.); zhaotianyu@mail.neu.edu.cn (T.Z.)

## Supplementary Materials:

**Table S1.** The database for the aerodynamic forces and moments of the ski jumping ski.

| $\alpha/^\circ$ | $\beta/^\circ$ | $\gamma/^\circ$ | $C_L$                 | $C_D$                 | $C_L / C_D$           | $M_s$                  | $M_L$                  | $M_D$                  |
|-----------------|----------------|-----------------|-----------------------|-----------------------|-----------------------|------------------------|------------------------|------------------------|
|                 | 0              | 0               | $3.84 \times 10^{-4}$ | $1.29 \times 10^{-2}$ | $2.98 \times 10^{-2}$ | $-4.43 \times 10^{-4}$ | $3.04 \times 10^{-4}$  | $-7.06 \times 10^{-6}$ |
|                 |                | 10              | $3.77 \times 10^{-4}$ | $1.29 \times 10^{-2}$ | $2.92 \times 10^{-2}$ | $-1.24 \times 10^{-3}$ | $8.96 \times 10^{-5}$  | $-7.06 \times 10^{-6}$ |
|                 |                | 20              | $3.59 \times 10^{-4}$ | $1.29 \times 10^{-2}$ | $2.78 \times 10^{-2}$ | $-1.23 \times 10^{-3}$ | $-1.27 \times 10^{-4}$ | $-7.06 \times 10^{-6}$ |
|                 |                | 30              | $3.29 \times 10^{-4}$ | $1.29 \times 10^{-2}$ | $2.55 \times 10^{-2}$ | $-1.19 \times 10^{-3}$ | $-3.40 \times 10^{-4}$ | $-7.06 \times 10^{-6}$ |
|                 |                | 40              | $2.9 \times 10^{-4}$  | $1.29 \times 10^{-2}$ | $2.25 \times 10^{-2}$ | $-1.11 \times 10^{-3}$ | $-5.41 \times 10^{-4}$ | $-7.06 \times 10^{-6}$ |
|                 | 10             | 0               | $8.48 \times 10^{-3}$ | $1.53 \times 10^{-2}$ | 0.554                 | $-3.38 \times 10^{-3}$ | $-8.57 \times 10^{-4}$ | $-9.27 \times 10^{-4}$ |
|                 |                | 10              | 0.0361                | $1.72 \times 10^{-2}$ | 2.12                  | $-7.09 \times 10^{-3}$ | $-1.97 \times 10^{-3}$ | $1.56 \times 10^{-4}$  |
|                 |                | 20              | 0.0513                | $2.03 \times 10^{-2}$ | 2.53                  | $-1.11 \times 10^{-2}$ | $-3.89 \times 10^{-3}$ | $3.76 \times 10^{-4}$  |
|                 |                | 30              | 0.0550                | $2.32 \times 10^{-2}$ | 2.37                  | $-1.32 \times 10^{-2}$ | $-7.15 \times 10^{-3}$ | $4.97 \times 10^{-4}$  |
|                 |                | 40              | 0.0572                | $2.63 \times 10^{-2}$ | 2.18                  | $-1.36 \times 10^{-2}$ | $-1.02 \times 10^{-2}$ | $3.17 \times 10^{-4}$  |
|                 | 20             | 0               | 0.0205                | $1.99 \times 10^{-2}$ | 1.03                  | $-7.85 \times 10^{-3}$ | $-2.10 \times 10^{-3}$ | $2.27 \times 10^{-3}$  |
|                 |                | 10              | 0.114                 | $2.88 \times 10^{-2}$ | 3.96                  | $-2.52 \times 10^{-2}$ | $-6.13 \times 10^{-3}$ | $5.85 \times 10^{-3}$  |
|                 |                | 20              | 0.157                 | $4.52 \times 10^{-2}$ | 3.47                  | $-3.13 \times 10^{-2}$ | $-1.34 \times 10^{-2}$ | $6.40 \times 10^{-3}$  |
|                 |                | 30              | 0.187                 | $6.63 \times 10^{-2}$ | 2.83                  | $-3.84 \times 10^{-2}$ | $-2.29 \times 10^{-2}$ | $7.70 \times 10^{-3}$  |
|                 |                | 40              | 0.208                 | $8.82 \times 10^{-2}$ | 2.36                  | $-3.10 \times 10^{-2}$ | $-3.10 \times 10^{-2}$ | $6.53 \times 10^{-3}$  |
|                 | 30             | 0               | 0.0298                | $2.86 \times 10^{-2}$ | 1.04                  | $-1.10 \times 10^{-2}$ | $-3.60 \times 10^{-3}$ | $5.49 \times 10^{-3}$  |
|                 |                | 10              | 0.208                 | $5.12 \times 10^{-2}$ | 4.06                  | $-4.35 \times 10^{-2}$ | $-1.12 \times 10^{-2}$ | $1.87 \times 10^{-3}$  |
|                 |                | 20              | 0.291                 | $9.46 \times 10^{-2}$ | 3.08                  | $-5.64 \times 10^{-2}$ | $-2.67 \times 10^{-2}$ | $2.27 \times 10^{-3}$  |
|                 |                | 30              | 0.422                 | $1.62 \times 10^{-2}$ | 2.61                  | $-7.75 \times 10^{-2}$ | $-2.42 \times 10^{-2}$ | $2.72 \times 10^{-3}$  |
|                 |                | 40              | 0.387                 | $2.07 \times 10^{-2}$ | 1.87                  | $-6.89 \times 10^{-2}$ | $-6.12 \times 10^{-2}$ | $2.45 \times 10^{-3}$  |
|                 | 40             | 0               | 0.0338                | $4.13 \times 10^{-2}$ | 0.819                 | $-1.19 \times 10^{-2}$ | $-5.13 \times 10^{-3}$ | $8.97 \times 10^{-3}$  |
|                 |                | 10              | 0.303                 | $8.51 \times 10^{-2}$ | 3.56                  | $-5.27 \times 10^{-2}$ | $-1.55 \times 10^{-2}$ | $3.39 \times 10^{-3}$  |
|                 |                | 20              | 0.406                 | $1.57 \times 10^{-2}$ | 2.59                  | $-6.72 \times 10^{-2}$ | $-3.59 \times 10^{-2}$ | $4.08 \times 10^{-3}$  |
|                 |                | 30              | 0.497                 | $2.52 \times 10^{-2}$ | 1.97                  | $-7.72 \times 10^{-2}$ | $-5.93 \times 10^{-2}$ | $4.40 \times 10^{-3}$  |
|                 |                | 40              | 0.536                 | $3.42 \times 10^{-2}$ | 1.57                  | $-8.25 \times 10^{-2}$ | $-8.27 \times 10^{-2}$ | $4.48 \times 10^{-3}$  |
| 10              | 0              | 0               | 0.0862                | $3.48 \times 10^{-2}$ | 2.48                  | $-2.39 \times 10^{-2}$ | $7.95 \times 10^{-4}$  | $-1.95 \times 10^{-3}$ |
|                 |                | 10              | 0.0886                | $3.50 \times 10^{-2}$ | 2.53                  | $-2.32 \times 10^{-2}$ | $-3.25 \times 10^{-3}$ | $-2.56 \times 10^{-3}$ |
|                 |                | 20              | 0.0876                | $3.44 \times 10^{-2}$ | 2.55                  | $-2.16 \times 10^{-2}$ | $-7.38 \times 10^{-3}$ | $-3.29 \times 10^{-3}$ |

**Citation:** Zhang, L.; Li, X.; Wang, X.; Chen, L.; Zhao, T. Performance and Biomechanics in the Flight Period of Ski Jumping: Influence of Ski Attitude. *Biology* **2022**, *11*, 671. <https://doi.org/10.3390/biology11050671>

Academic Editors: Filip Kukić, Jay Dawes, Robin Orr and Katie M. Heinrich

Received: 4 April 2022

Accepted: 24 April 2022

Published: 27 April 2022

**Publisher's Note:** MDPI stays neutral with regard to jurisdictional claims in published maps and institutional affiliations.

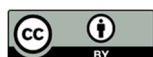

**Copyright:** © 2022 by the authors. Licensee MDPI, Basel, Switzerland. This article is an open access article distributed under the terms and conditions of the Creative Commons Attribution (CC BY) license (<https://creativecommons.org/licenses/by/4.0/>).

|  |    |    |        |                       |       |                        |                        |                        |
|--|----|----|--------|-----------------------|-------|------------------------|------------------------|------------------------|
|  |    | 30 | 0.0816 | $3.28 \times 10^{-2}$ | 2.48  | $-1.80 \times 10^{-2}$ | $-1.06 \times 10^{-2}$ | $-3.90 \times 10^{-3}$ |
|  |    | 40 | 0.0680 | $2.98 \times 10^{-2}$ | 2.27  | $-1.38 \times 10^{-2}$ | $-1.19 \times 10^{-2}$ | $-4.01 \times 10^{-3}$ |
|  |    | 0  | 0.156  | $4.80 \times 10^{-2}$ | 3.25  | $-2.92 \times 10^{-2}$ | $4.89 \times 10^{-4}$  | $1.13 \times 10^{-3}$  |
|  |    | 10 | 0.174  | $5.75 \times 10^{-2}$ | 3.02  | $-3.23 \times 10^{-2}$ | $-4.63 \times 10^{-3}$ | $3.62 \times 10^{-4}$  |
|  | 10 | 20 | 0.166  | $6.28 \times 10^{-2}$ | 2.64  | $-3.37 \times 10^{-2}$ | $-1.04 \times 10^{-2}$ | $-4.34 \times 10^{-4}$ |
|  |    | 30 | 0.136  | $6.06 \times 10^{-2}$ | 2.24  | $-3.45 \times 10^{-2}$ | $-1.84 \times 10^{-2}$ | $-1.36 \times 10^{-3}$ |
|  |    | 40 | 0.111  | $5.93 \times 10^{-2}$ | 1.86  | $-2.97 \times 10^{-2}$ | $-2.36 \times 10^{-2}$ | $-2.67 \times 10^{-3}$ |
|  |    | 0  | 0.248  | $7.40 \times 10^{-2}$ | 3.34  | $-5.02 \times 10^{-2}$ | $-3.74 \times 10^{-3}$ | $1.07 \times 10^{-2}$  |
|  |    | 10 | 0.296  | 0.102                 | 2.91  | $-5.82 \times 10^{-2}$ | $-1.19 \times 10^{-2}$ | $1.09 \times 10^{-2}$  |
|  | 20 | 20 | 0.347  | 0.135                 | 2.56  | $-5.93 \times 10^{-2}$ | $-2.04 \times 10^{-2}$ | $8.27 \times 10^{-3}$  |
|  |    | 30 | 0.369  | 0.172                 | 2.15  | $-5.67 \times 10^{-2}$ | $-3.10 \times 10^{-2}$ | $3.79 \times 10^{-3}$  |
|  |    | 40 | 0.329  | 0.187                 | 1.75  | $-4.54 \times 10^{-2}$ | $-3.84 \times 10^{-2}$ | $-2.28 \times 10^{-3}$ |
|  |    | 0  | 0.328  | 0.100                 | 3.28  | $-6.42 \times 10^{-2}$ | $-9.46 \times 10^{-3}$ | $2.55 \times 10^{-2}$  |
|  |    | 10 | 0.422  | 0.162                 | 2.61  | $-7.75 \times 10^{-2}$ | $-2.42 \times 10^{-2}$ | $2.72 \times 10^{-2}$  |
|  | 30 | 20 | 0.480  | 0.223                 | 2.15  | $-8.86 \times 10^{-2}$ | $-4.07 \times 10^{-2}$ | $2.84 \times 10^{-2}$  |
|  |    | 30 | 0.554  | 0.309                 | 1.79  | $-8.97 \times 10^{-2}$ | $-5.85 \times 10^{-2}$ | $2.26 \times 10^{-2}$  |
|  |    | 40 | 0.554  | 0.396                 | 1.39  | $-8.68 \times 10^{-2}$ | $-7.73 \times 10^{-2}$ | $1.50 \times 10^{-2}$  |
|  |    | 0  | 0.382  | 0.125                 | 3.06  | $-6.58 \times 10^{-2}$ | $-1.32 \times 10^{-2}$ | $4.01 \times 10^{-2}$  |
|  |    | 10 | 0.501  | 0.214                 | 2.35  | $-8.27 \times 10^{-2}$ | $-3.35 \times 10^{-2}$ | $4.54 \times 10^{-2}$  |
|  | 40 | 20 | 0.587  | 0.313                 | 1.88  | $-9.49 \times 10^{-2}$ | $-5.56 \times 10^{-2}$ | $4.72 \times 10^{-2}$  |
|  |    | 30 | 0.630  | 0.403                 | 1.56  | -0.102                 | $-7.78 \times 10^{-2}$ | $4.59 \times 10^{-2}$  |
|  |    | 40 | 0.613  | 0.530                 | 1.16  | -0.109                 | -0.113                 | $4.26 \times 10^{-2}$  |
|  |    | 0  | 0.239  | 0.114                 | 2.11  | $-5.92 \times 10^{-2}$ | $2.46 \times 10^{-3}$  | $-5.47 \times 10^{-3}$ |
|  |    | 10 | 0.251  | 0.118                 | 2.13  | $-6.10 \times 10^{-2}$ | $-8.33 \times 10^{-3}$ | $-9.32 \times 10^{-3}$ |
|  | 0  | 20 | 0.308  | 0.140                 | 2.20  | $-4.92 \times 10^{-2}$ | $-1.26 \times 10^{-2}$ | $-1.25 \times 10^{-2}$ |
|  |    | 30 | 0.307  | 0.139                 | 2.22  | $-4.33 \times 10^{-2}$ | $-2.07 \times 10^{-2}$ | $-1.75 \times 10^{-2}$ |
|  |    | 40 | 0.246  | 0.115                 | 2.14  | $3.91 \times 10^{-2}$  | $-2.81 \times 10^{-2}$ | $-1.82 \times 10^{-2}$ |
|  |    | 0  | 0.432  | 0.186                 | 2.33  | $-6.18 \times 10^{-2}$ | $4.37 \times 10^{-5}$  | $-7.21 \times 10^{-4}$ |
|  |    | 10 | 0.340  | 0.164                 | 2.07  | $-6.49 \times 10^{-2}$ | $-1.12 \times 10^{-2}$ | $-2.04 \times 10^{-3}$ |
|  | 20 | 20 | 0.266  | 0.145                 | 1.84  | $-6.52 \times 10^{-2}$ | $-2.26 \times 10^{-2}$ | $-4.18 \times 10^{-3}$ |
|  |    | 30 | 0.240  | 0.144                 | 1.67  | $-5.89 \times 10^{-2}$ | $-3.31 \times 10^{-2}$ | $-8.32 \times 10^{-3}$ |
|  |    | 40 | 0.242  | 0.159                 | 1.52  | $-5.32 \times 10^{-2}$ | $-4.14 \times 10^{-2}$ | $-1.34 \times 10^{-2}$ |
|  |    | 0  | 0.515  | 0.220                 | 2.34  | $-9.01 \times 10^{-2}$ | $-6.13 \times 10^{-3}$ | $1.75 \times 10^{-2}$  |
|  |    | 10 | 0.581  | 0.289                 | 2.01  | $-9.74 \times 10^{-2}$ | $-1.96 \times 10^{-2}$ | $1.34 \times 10^{-2}$  |
|  | 20 | 20 | 0.569  | 0.330                 | 1.72  | $-8.60 \times 10^{-2}$ | $-2.96 \times 10^{-2}$ | $4.22 \times 10^{-3}$  |
|  |    | 30 | 0.382  | 0.263                 | 1.45  | $-7.85 \times 10^{-2}$ | $-4.75 \times 10^{-2}$ | $-1.33 \times 10^{-3}$ |
|  |    | 40 | 0.279  | 0.236                 | 1.18  | $-6.85 \times 10^{-2}$ | $-5.89 \times 10^{-2}$ | $-6.73 \times 10^{-3}$ |
|  |    | 0  | 0.561  | 0.255                 | 2.20  | $-9.79 \times 10^{-2}$ | $-1.77 \times 10^{-2}$ | $3.44 \times 10^{-2}$  |
|  |    | 10 | 0.634  | 0.338                 | 1.88  | -0.115                 | $-3.60 \times 10^{-2}$ | $3.58 \times 10^{-2}$  |
|  | 30 | 20 | 0.729  | 0.475                 | 1.54  | -0.121                 | $-5.72 \times 10^{-2}$ | $2.76 \times 10^{-2}$  |
|  |    | 30 | 0.715  | 0.569                 | 1.26  | -0.108                 | $-7.35 \times 10^{-2}$ | $1.03 \times 10^{-2}$  |
|  |    | 40 | 0.441  | 0.451                 | 0.977 | $-9.33 \times 10^{-2}$ | $-8.61 \times 10^{-2}$ | $3.70 \times 10^{-3}$  |

|    |    |    |       |       |       |                        |                        |                        |
|----|----|----|-------|-------|-------|------------------------|------------------------|------------------------|
|    |    | 0  | 0.590 | 0.282 | 2.10  | $-9.76 \times 10^{-2}$ | $-2.85 \times 10^{-2}$ | $5.30 \times 10^{-2}$  |
|    |    | 10 | 0.679 | 0.387 | 1.75  | -0.114                 | $-5.02 \times 10^{-2}$ | $5.50 \times 10^{-2}$  |
|    | 40 | 20 | 0.703 | 0.492 | 1.43  | -0.125                 | $-7.69 \times 10^{-2}$ | $5.22 \times 10^{-2}$  |
|    |    | 30 | 0.678 | 0.622 | 1.09  | -0.132                 | -0.111                 | $4.30 \times 10^{-2}$  |
|    |    | 40 | 0.581 | 0.703 | 0.826 | -0.114                 | -0.123                 | $2.20 \times 10^{-2}$  |
| 30 | 0  | 0  | 0.414 | 0.272 | 1.52  | $-9.75 \times 10^{-2}$ | $6.05 \times 10^{-3}$  | $-9.49 \times 10^{-3}$ |
|    |    | 10 | 0.437 | 0.286 | 1.52  | -0.102                 | $-9.12 \times 10^{-3}$ | $-1.82 \times 10^{-2}$ |
|    |    | 20 | 0.604 | 0.386 | 1.56  | $-8.85 \times 10^{-2}$ | $-2.24 \times 10^{-2}$ | $-3.23 \times 10^{-2}$ |
|    |    | 30 | 0.560 | 0.359 | 1.56  | $-9.48 \times 10^{-2}$ | $-4.02 \times 10^{-2}$ | $-4.27 \times 10^{-2}$ |
|    |    | 40 | 0.441 | 0.288 | 1.53  | $-7.89 \times 10^{-2}$ | $-4.81 \times 10^{-2}$ | $-4.47 \times 10^{-2}$ |
|    | 10 | 0  | 0.634 | 0.408 | 1.56  | $-9.99 \times 10^{-2}$ | $4.09 \times 10^{-3}$  | $1.92 \times 10^{-3}$  |
|    |    | 10 | 0.445 | 0.311 | 1.43  | -0.105                 | $-1.84 \times 10^{-2}$ | $-4.71 \times 10^{-3}$ |
|    |    | 20 | 0.406 | 0.305 | 1.33  | $-9.84 \times 10^{-2}$ | $-3.26 \times 10^{-2}$ | $-1.27 \times 10^{-2}$ |
|    |    | 30 | 0.427 | 0.344 | 1.23  | $-9.44 \times 10^{-2}$ | $-4.82 \times 10^{-2}$ | $-2.40 \times 10^{-2}$ |
|    |    | 40 | 0.499 | 0.431 | 1.16  | $-8.69 \times 10^{-2}$ | $-6.20 \times 10^{-2}$ | $-3.99 \times 10^{-2}$ |
|    | 20 | 0  | 0.813 | 0.515 | 1.58  | -0.134                 | $-1.22 \times 10^{-2}$ | $2.18 \times 10^{-2}$  |
|    |    | 10 | 0.794 | 0.571 | 1.40  | -0.123                 | $-2.87 \times 10^{-2}$ | $6.35 \times 10^{-3}$  |
|    |    | 20 | 0.502 | 0.420 | 1.20  | -0.118                 | $-4.99 \times 10^{-2}$ | $2.43 \times 10^{-4}$  |
|    |    | 30 | 0.408 | 0.395 | 1.03  | -0.101                 | $-6.17 \times 10^{-2}$ | $-1.09 \times 10^{-2}$ |
|    |    | 40 | 0.360 | 0.414 | 0.870 | $-9.64 \times 10^{-2}$ | $-7.91 \times 10^{-2}$ | $-2.28 \times 10^{-2}$ |
|    | 30 | 0  | 0.726 | 0.456 | 1.59  | -0.136                 | $-2.86 \times 10^{-2}$ | $4.56 \times 10^{-2}$  |
|    |    | 10 | 0.766 | 0.585 | 1.31  | -0.155                 | $-5.72 \times 10^{-2}$ | $3.90 \times 10^{-2}$  |
|    |    | 20 | 0.749 | 0.690 | 1.09  | -0.138                 | $-7.03 \times 10^{-2}$ | $1.71 \times 10^{-2}$  |
|    |    | 30 | 0.506 | 0.571 | 0.887 | -0.122                 | $-8.81 \times 10^{-2}$ | $3.25 \times 10^{-3}$  |
|    |    | 40 | 0.382 | 0.548 | 0.698 | -0.102                 | $-9.68 \times 10^{-2}$ | $-1.12 \times 10^{-2}$ |
|    | 40 | 0  | 0.730 | 0.459 | 1.59  | -0.126                 | $-4.11 \times 10^{-2}$ | $6.49 \times 10^{-2}$  |
|    |    | 10 | 0.752 | 0.588 | 1.28  | -0.142                 | $-7.03 \times 10^{-2}$ | $6.01 \times 10^{-2}$  |
|    |    | 20 | 0.723 | 0.721 | 1.002 | -0.148                 | -0.101                 | $4.59 \times 10^{-2}$  |
|    |    | 30 | 0.605 | 0.774 | 0.781 | -0.134                 | -0.112                 | $2.38 \times 10^{-2}$  |
|    |    | 40 | 0.435 | 0.756 | 0.575 | -0.114                 | -0.127                 | $1.52 \times 10^{-3}$  |
| 40 | 0  | 0  | 0.556 | 0.509 | 1.09  | -0.135                 | $-8.70 \times 10^{-2}$ | $-1.25 \times 10^{-2}$ |
|    |    | 10 | 0.579 | 0.531 | 1.09  | -0.142                 | $-6.99 \times 10^{-3}$ | $-2.80 \times 10^{-2}$ |
|    |    | 20 | 0.734 | 0.664 | 1.10  | -0.133                 | $-2.06 \times 10^{-2}$ | $-4.66 \times 10^{-2}$ |
|    |    | 30 | 0.653 | 0.592 | 1.10  | -0.140                 | $-4.74 \times 10^{-2}$ | $-6.81 \times 10^{-2}$ |
|    |    | 40 | 0.495 | 0.454 | 1.09  | -0.111                 | $-5.67 \times 10^{-2}$ | $-7.09 \times 10^{-2}$ |
|    | 10 | 0  | 0.619 | 0.564 | 1.10  | -0.149                 | $-3.78 \times 10^{-3}$ | $4.31 \times 10^{-3}$  |
|    |    | 10 | 0.553 | 0.537 | 1.03  | -0.137                 | $-2.24 \times 10^{-2}$ | $-1.10 \times 10^{-2}$ |
|    |    | 20 | 0.532 | 0.553 | 0.963 | -0.138                 | $-4.10 \times 10^{-2}$ | $-2.57 \times 10^{-2}$ |
|    |    | 30 | 0.577 | 0.640 | 0.901 | -0.131                 | $-5.65 \times 10^{-2}$ | $-4.47 \times 10^{-2}$ |
|    |    | 40 | 0.514 | 0.618 | 0.834 | -0.131                 | $-8.18 \times 10^{-2}$ | $-6.73 \times 10^{-2}$ |
|    | 20 | 0  | 0.776 | 0.701 | 1.11  | -0.169                 | $-2.30 \times 10^{-2}$ | $2.59 \times 10^{-2}$  |
|    |    | 10 | 0.628 | 0.642 | 0.979 | -0.154                 | $-4.23 \times 10^{-2}$ | $7.04 \times 10^{-3}$  |

|    |    |        |        |       |        |                        |                        |
|----|----|--------|--------|-------|--------|------------------------|------------------------|
|    | 20 | 0.531  | 0.618  | 0.860 | -0.138 | $-5.80 \times 10^{-2}$ | $-1.05 \times 10^{-2}$ |
|    | 30 | 0.470  | 0.632  | 0.743 | -0.133 | $-7.59 \times 10^{-2}$ | $-2.68 \times 10^{-2}$ |
|    | 40 | 0.420  | 0.675  | 0.623 | -0.126 | $-9.43 \times 10^{-2}$ | $-4.81 \times 10^{-2}$ |
| 30 | 0  | 0.770  | 0.688  | 1.12  | -0.170 | $-4.61 \times 10^{-2}$ | $5.09 \times 10^{-2}$  |
|    | 10 | 0.725  | 0.771  | 0.939 | -0.167 | $-6.69 \times 10^{-2}$ | $2.99 \times 10^{-2}$  |
|    | 20 | 0.588  | 0.758  | 0.776 | -0.152 | $-8.41 \times 10^{-2}$ | $7.55 \times 10^{-3}$  |
|    | 30 | 0.467  | 0.744  | 0.627 | -0.134 | $-9.56 \times 10^{-2}$ | $-1.28 \times 10^{-3}$ |
|    | 40 | 0.363  | 0.759  | 0.478 | -0.125 | -0.113                 | $-3.30 \times 10^{-2}$ |
| 40 | 0  | 0.784  | 0.687  | 1.14  | -0.148 | $-5.80 \times 10^{-2}$ | $6.81 \times 10^{-2}$  |
|    | 10 | 0.7445 | 0.819  | 0.909 | -0.156 | $-8.50 \times 10^{-2}$ | $5.20 \times 10^{-2}$  |
|    | 20 | 0.639  | 0.896  | 0.714 | -0.152 | -0.108                 | $2.91 \times 10^{-2}$  |
|    | 30 | 0.488  | 0.9110 | 0.536 | -0.139 | -0.124                 | $3.32 \times 10^{-3}$  |
|    | 40 | 0.338  | 0.905  | 0.373 | -0.122 | -0.133                 | $-1.97 \times 10^{-2}$ |
